# Supplementary material for: Ethynylation of Formaldehyde over CuO/SiO2 Catalysts Modified by Mg Species: Effects of the Existential States of Mg Species
Source: MDPI journal article supplement (doi:10.3390/nano9081137), 2019-08-07
Supplement: s1 [file s1]

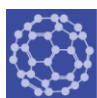

Article

# Ethynylation of Formaldehyde over CuO/SiO<sub>2</sub> Catalysts Modified by Mg Species: Effects of the Existential States of Mg Species

Zhipeng Wang, Lijun Ban, Pingfan Meng, Haitao Li \* and Yongxiang Zhao \*

Engineering Research Center of Ministry of Education for Fine Chemicals, School of Chemistry and Chemical Engineering, Shanxi University, Taiyuan 030006, China

\* Correspondence: htlisxu.edu.cn (H.L.); yxzhaosxu.edu.cn (Y.Z.); Tel.: +86-138-3457-8761 (H.L.)

Table S1. Acid-base properties of supports and catalysts.

| Samples                   | Acidity <sup>a</sup> (μmol·g <sup>-2</sup> ) | Basicity <sup>b</sup> (μmol·g <sup>-2</sup> ) |
|---------------------------|----------------------------------------------|-----------------------------------------------|
| SiO <sub>2</sub>          | 4.3                                          | 2.4                                           |
| MgO/SiO <sub>2</sub>      | 18.4                                         | 83.5                                          |
| SiO <sub>2</sub> -MgO     | 131.2                                        | 102.3                                         |
| CuO/SiO <sub>2</sub>      | 20.6                                         | 9.3                                           |
| CuO/MgO/SiO <sub>2</sub>  | 16.9                                         | 65.8                                          |
| CuO/SiO <sub>2</sub> -MgO | 47.8                                         | 88.4                                          |

<sup>a</sup> Acidity was calculated by NH<sub>3</sub>-TPD peaks; <sup>b</sup> Basicity was calculated by CO<sub>2</sub>-TPD peaks of medium-strong base sites

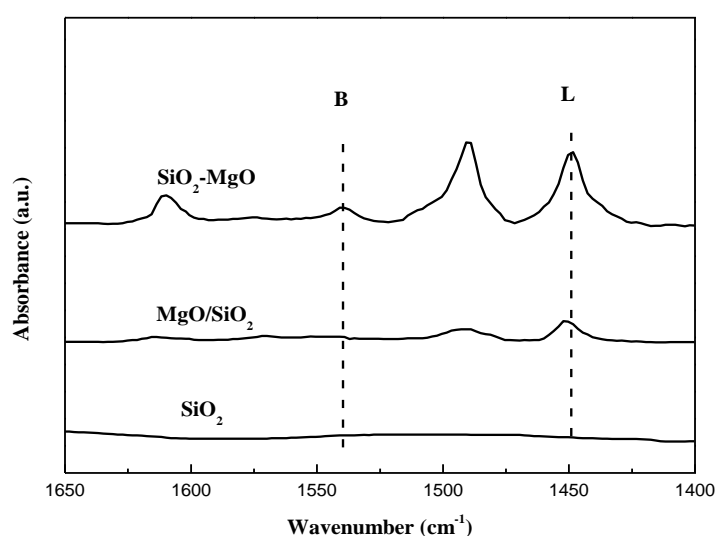

Figure S1. Py-IR spectra of supports.

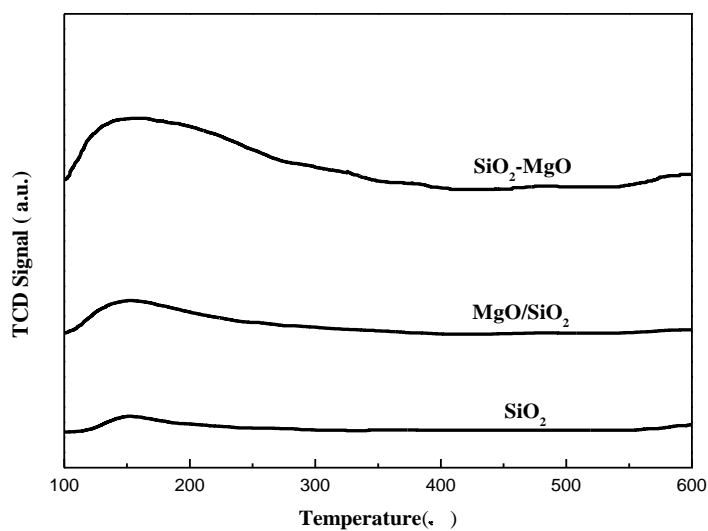

Figure S2. NH<sub>3</sub>-TPD spectra of supports.

Table S2. Ethynylation performance of catalysts under the reaction temperature of 90 °C.

| Catalysts                 | Conversion of HCHO/% | Selectivity of BD/% | Yield of BD/% |
|---------------------------|----------------------|---------------------|---------------|
| CuO/SiO <sub>2</sub>      | 39.4                 | 89.9                | 35.4          |
| CuO/MgO/SiO <sub>2</sub>  | 63.1                 | 89.6                | 56.5          |
| CuO/SiO <sub>2</sub> -MgO | 75.1                 | 90.1                | 67.2          |
| MgO/SiO <sub>2</sub>      | 0                    | 0                   | 0             |
| SiO <sub>2</sub> -MgO     | 0                    | 0                   | 0             |

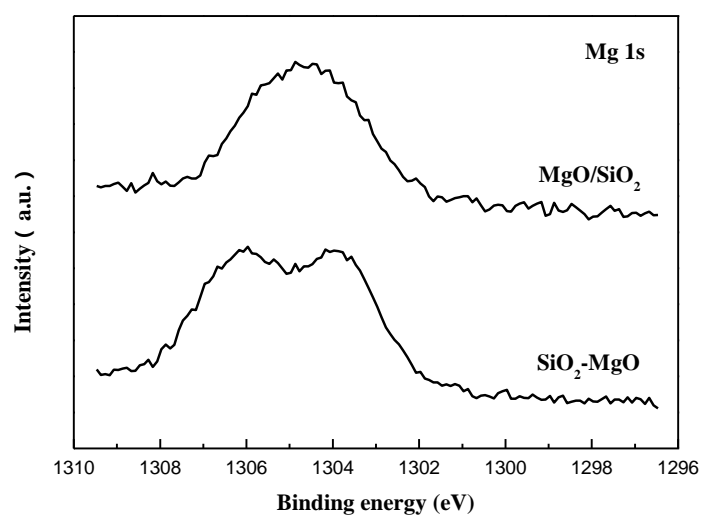

Figure S3. XPS spectra of supports.
